# Supplementary material for: Src Family Kinase Inhibitors Block Translation of Alphavirus Subgenomic mRNAs
Source: PubMed Central journal article supplement (PMC6496153; doi:10.1128/aac.02325-18), 2019-03-27
Supplement: AAC.02325-18-s0001.pdf [file AAC.02325-18-s0001.pdf]

1 **Supplemental Figures and Tables**

2

3 **Src Family Kinase Inhibitors Block Translation of Alphavirus Subgenomic mRNAs**

4

5 Rebecca Broeckel<sup>1</sup>, Sanjay Sarkar<sup>3</sup>, Nicholas A. May<sup>4</sup>, Jennifer Totonchy<sup>1,#</sup>, Craig N.

6 Kreklywich<sup>1</sup>, Patricia Smith<sup>1</sup>, Lee Graves<sup>4</sup>, Victor R. DeFilippis<sup>1,2</sup>, Mark Heise<sup>3,5</sup>, Thomas E.

7 Morrison<sup>6</sup>, Nathaniel Moorman<sup>5</sup>, and Daniel N. Streblow<sup>1,2,\*</sup>

8

9 Vaccine and Gene Therapy Institute, Oregon Health and Science University, Beaverton,

10 Oregon<sup>1</sup>; Division of Pathobiology and Immunology, Oregon National Primate Research Center,

11 Beaverton, Oregon<sup>2</sup>; Department of Genetics, The University of North Carolina at Chapel Hill,

12 Chapel Hill, North Carolina<sup>3</sup>; Department of Pharmacology, The University of North Carolina<sup>4</sup>,

13 Department of Microbiology and Immunology, The University of North Carolina<sup>5</sup>, Department of

14 Immunology and Microbiology, University of Colorado School of Medicine, Aurora, Colorado<sup>6</sup>

15

16 Running Head: Inhibiting alphavirus protein synthesis

17

18 \*Address correspondence to Daniel N. Streblow, [streblow@ohsu.edu](mailto:streblow@ohsu.edu)

19 #Present address: Department of Biomedical and Pharmaceutical Sciences, Chapman

20 University School of Pharmacy, Irvine, California.

21

| Cluster 1   |                  |          | Cluster 2 | Cluster 3      |
|-------------|------------------|----------|-----------|----------------|
| TK2         | CSK              | CAMK2D   | AURKA     | BRAF;ARAF;RAF1 |
| PIK3C2A     | MTOR             | DYRK1A   | DAPK3     | NME1           |
| STK25       | ABL2             | PRKG1    | INSR      | EIF2AK2        |
| NME4        | MAPK8            | PRKD1    | FGFR1     | MAP2K4         |
| PDXK        | MAPK9            | EPHA7    | PDGFRA    | MAPK10         |
| GAK         | MAP2K3           | RPS6KA1  | PFKL      | MAP4K2         |
| RIPK2       | PIP4K2A          | MYLK     | JAK1      | MAPK7          |
| PIP5K1C     | CSNK1A1;CSNK1A1L | MAPK11   | BMPR1A    | CAMK2B         |
| STK16       | CSNK1D           | MAPK14   | ACVR1B    | STK11          |
| STK10       | CSNK1E           | MAP3K11  | TGFBR1    | TAOK1          |
| PRKD3       | GSK3A            | AAK1     | TGFBR2    | STRADA         |
| MAP4K4      | GSK3B            | ULK3     | PI4KA     | PI4K2B         |
| PAK4        | CDK7             | MARK2    | TEC       | SRPK1          |
| ABL1        | CDK9             | ADCK1    | CLK3      | TAOK3          |
| EGFR        | RPS6KA3          | VRK2     | EPHA4     | IRAK4          |
| PGK1;PGK2   | MAP2K6           | MAP4K3   | ACVR1     | NLK            |
| FYN         | LIMK1            | MINK1    | TYRO3     | STK24          |
| CDK1        | EPHB3            | PIK3C3   | DDR1      |                |
| FES         | EPHB4            | PIP4K2C  | PRPF4B    |                |
| YES1        | CSNK2A1;CSNK2A3  | NEK9     | BMPR2     |                |
| LYN         | PIP4K2B          | MARK4    | CDK13     |                |
| IGF1R       | SRPK2            | TP53RK   | MELK      |                |
| PDGFRB      | CSNK1G2          | PRKD2    | DDR2      |                |
| CDK4        | PRKDC            | SIK2     | NEK7;NEK6 |                |
| SRC         | CDK6             | SLK      | AURKB     |                |
| FER         | CDK5             | FN3KRP   | NEK1      |                |
| PRKCA       | CDK16            | BMP2K    | PKMYT1    |                |
| PRKACA      | CDK17            | ZAK      | RIOK2     |                |
| CSNK2A2     | MAP2K1           | CDK12    | CLK4      |                |
| NME2;NME2P1 | TEK              | TBK1     | CSNK1G1   |                |
| PRKACB      | PTK2             | TNIK     | ICK       |                |
| CDK2        | TNK2             | TAOK2    | PIKFYVE   |                |
| MAPK3       | DMPK             | SIK3     |           |                |
| MARK3       | STK4             | MAP3K2   |           |                |
| DCK         | PRKAA1           | MAP4K5   |           |                |
| MAPK1       | MAP2K5           | CDC42BPB |           |                |
| EPHA2       | STK3             | CSNK1G3  |           |                |
| EPHB2       | ATM              | MAP3K4   |           |                |
| GK;GK3P     | ILK              |          |           |                |
| MAP2K2      | CAMK2G           |          |           |                |

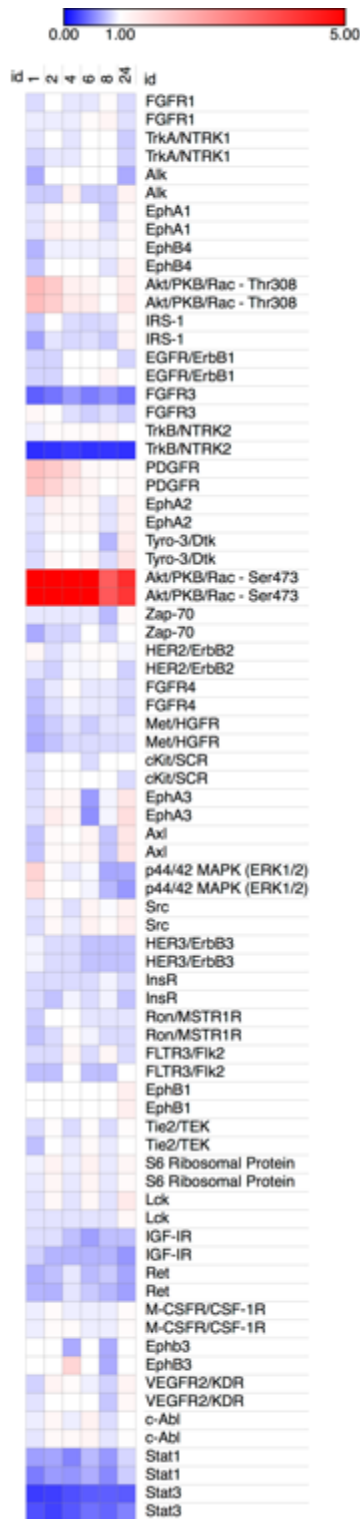

25  
26  
27  
28  
29  
30  
31  
32

**Supplemental Figure 1. Receptor tyrosine kinase antibody array chip reveals early and late phosphorylation patterns in CHIKV-infected human fibroblasts.** NHDFs were infected with CHIKV SL15649 MOI = 1, and lysates were collected at 0, 1, 2, 4, 6, 8, 24 hpi. Lysates were incubated on a receptor tyrosine kinase antibody array chip (Cell Signaling), and phospho-protein levels were quantified. Levels of the phospho-proteins are reported relative to uninfected 0 hpi samples.

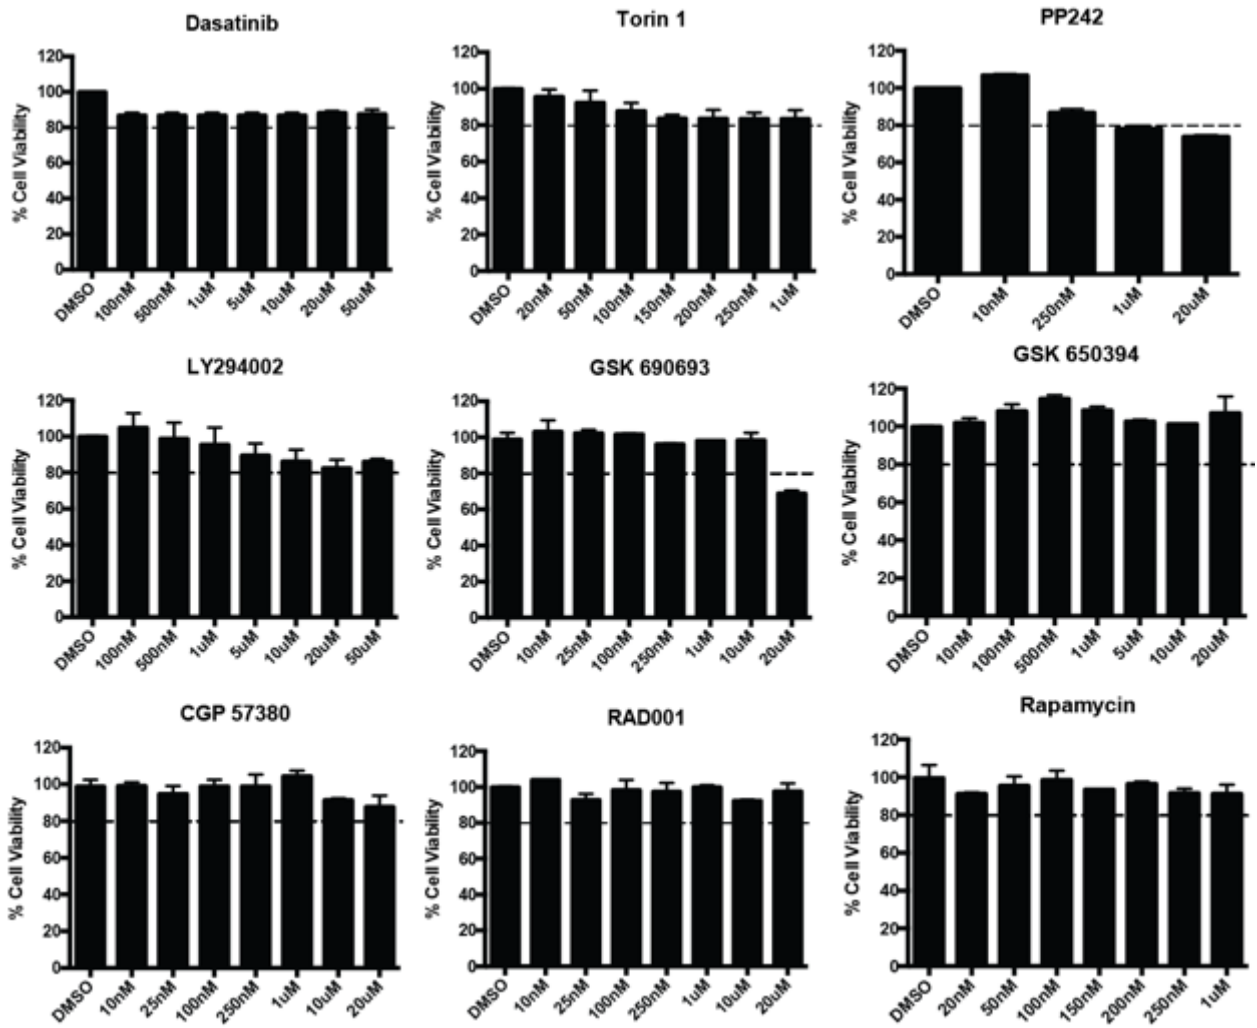

33  
 34  
 35  
 36  
 37  
 38  
 39  
 40

**Supplemental Figure 2. Cell viability in NHDFs after treatment with different inhibitors.** Cells were treated with the indicated concentrations of inhibitors. At 24 h post treatment, cell viability was measured with the CellTiter-Glo Luminiscent Cell Viability Assay kit. The dotted line marks 80% cell viability, which was the viability cutoff for our assay.

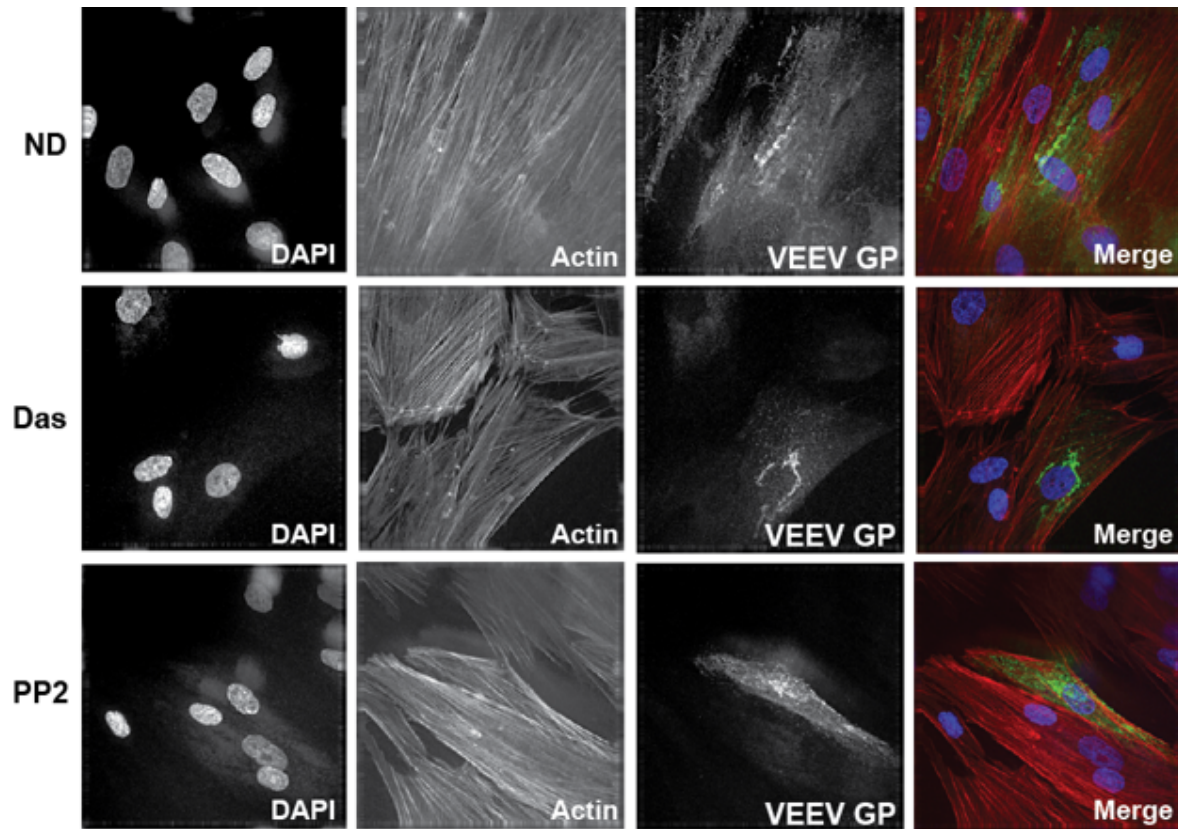

41  
 42 **Supplemental Figure 3. Dasatinib and PP2 block viral spread from infected cells.** Cells were infected with VEEV  
 43 (MOI = 1 PFU/cell). At 2 hpi, cells were washed with PBS and treated with 10  $\mu$ M Dasatinib or 10  $\mu$ M PP2. At 24 hpi,  
 44 cells were fixed, permeabilized, and stained for VEEV glycoproteins (green) and counterstained with DAPI (blue) and  
 45 Phalloidin (red) to highlight host DNA and Actin filaments.  
 46

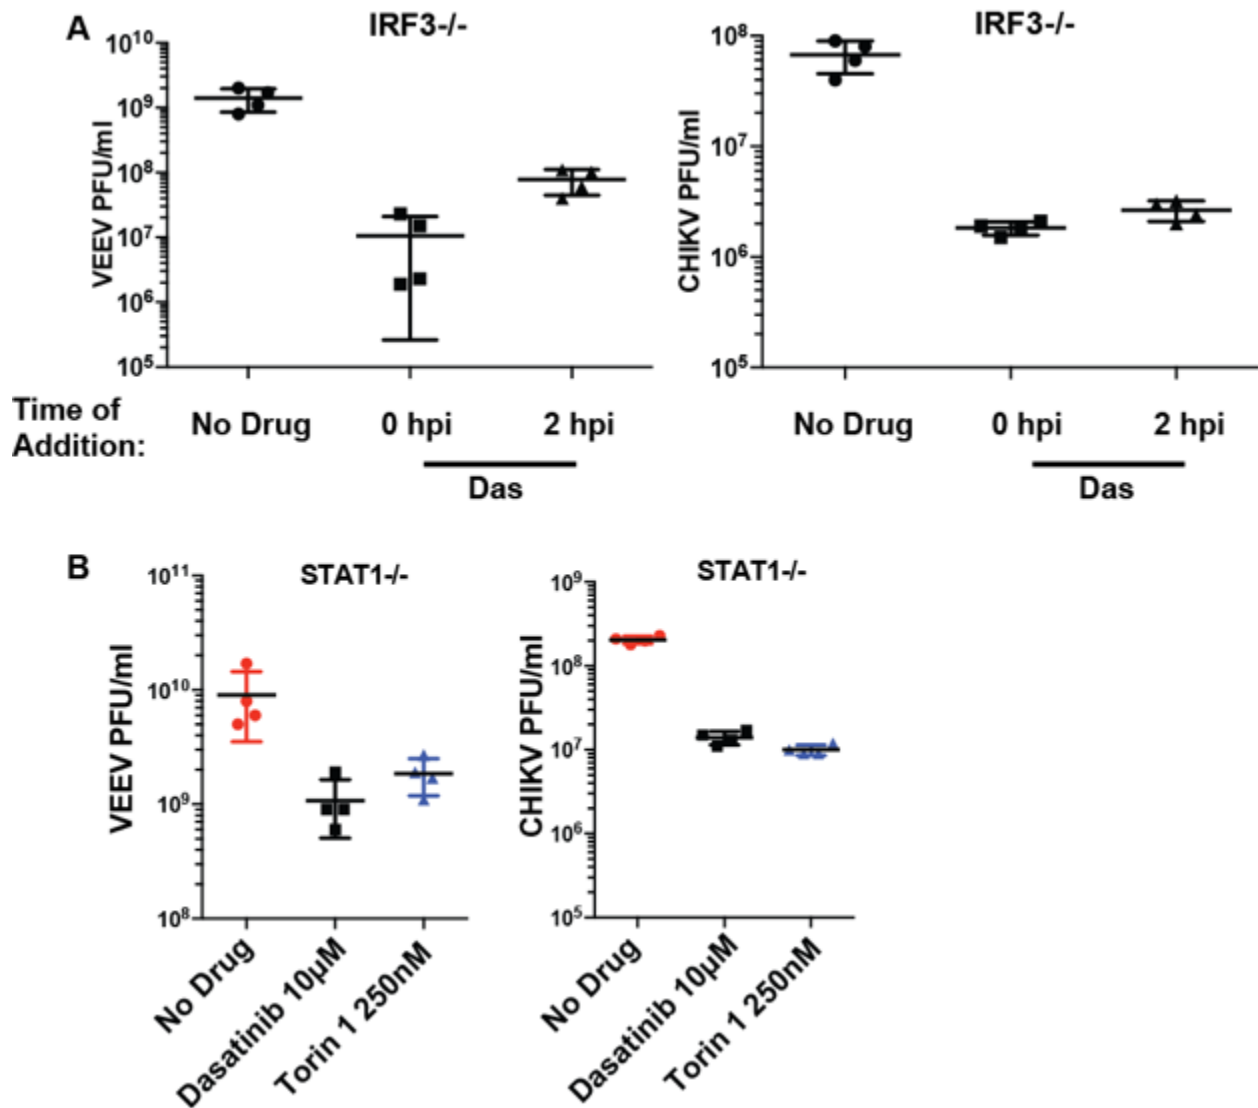

47  
 48 **Supplemental Figure 4. Dasatinib inhibits CHIKV and VEEV replication in IRF3<sup>-/-</sup> and STAT1<sup>-/-</sup> fibroblasts. (A)**  
 49 IRF3<sup>-/-</sup> telomerized human fibroblasts were infected with CHIKV and VEEV MOI = 1 and treated with dasatinib at 0 or  
 50 2 hpi. Supernatants were taken at 24hpi from infected cells and titered on Veros by limiting dilution. **(B)** STAT1<sup>-/-</sup>  
 51 telomerized human fibroblasts were infected with CHIKV, VEEV, or SINV (MOI = 1 PFU/cell) and treated with inhibitor  
 52 at 2 hpi. Supernatants were collected at 24 hpi and titered on Veros.  
 53

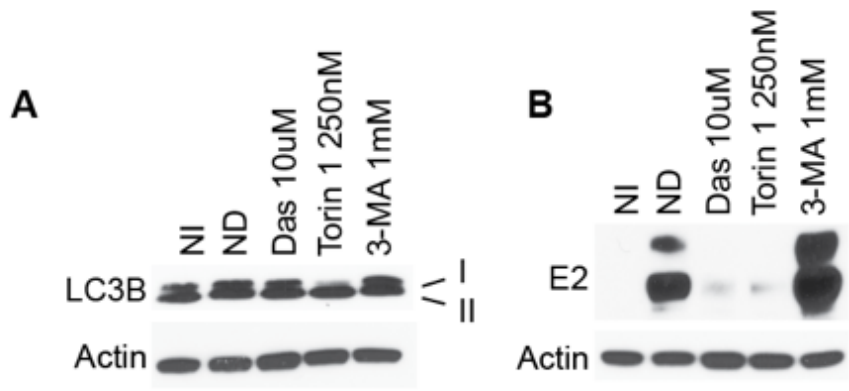

54  
55  
56  
57  
58  
59

**Supplemental Figure 5. Dasatinib and Torin 1 differentially affect autophagy.** NHDFs were infected with CHIKV (MOI = 3 PFU/cell) or left uninfected (NI). At 2 hpi, cells were washed with PBS, and media containing drug was added to the cells as indicated. At 7 hpi, lysates were analyzed for **(A)** LC3 or **(B)** E2.

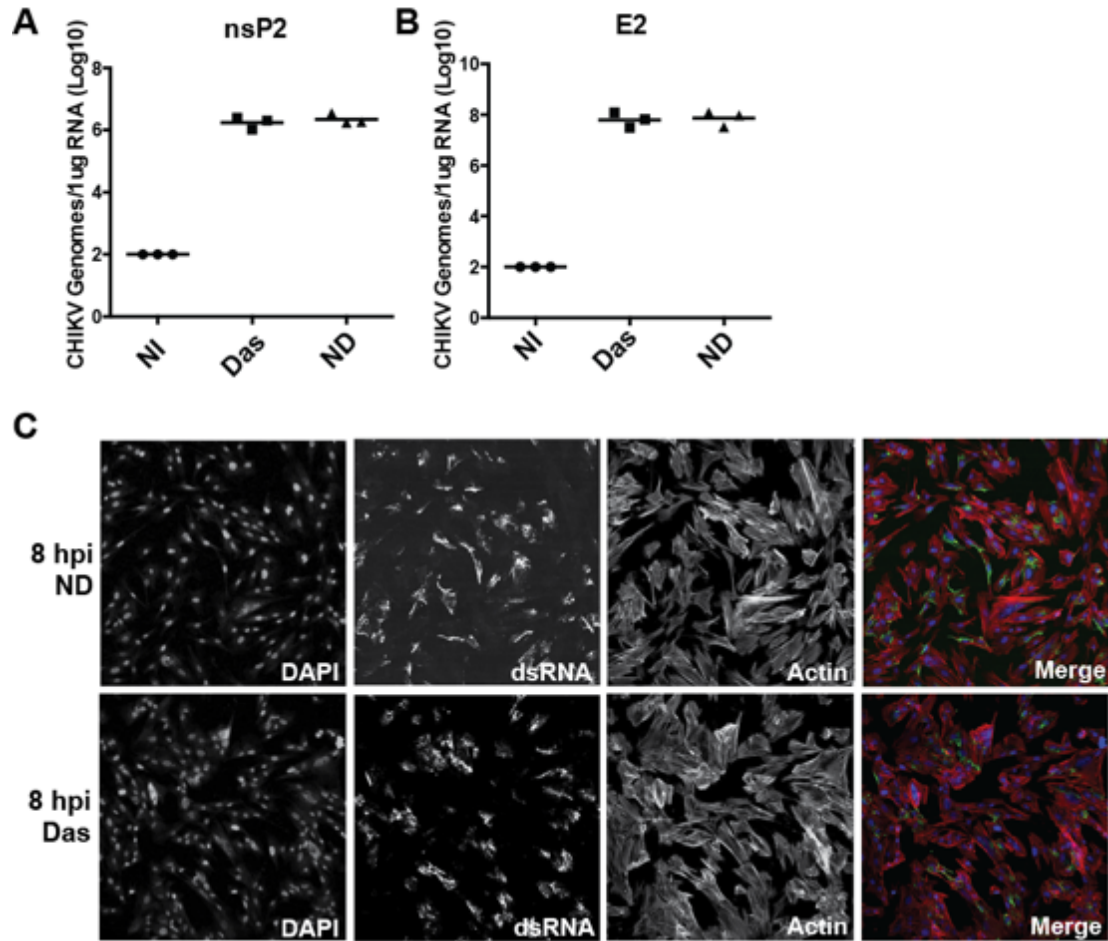

60  
61 **Supplemental Figure 6. Dasatinib does not affect RNA levels and dsRNA complexes.** NHDFs were infected with  
62 CHIKV<sub>181-25</sub> (MOI = 3 PFU/cell). At 2 hpi, cells were washed with PBS, and media with no inhibitor or 10  $\mu$ M dasatinib  
63 was added back to the cells. At 12 hpi, cells were washed extensively in PBS, and cell lysates were scraped in Trizol.  
64 CHIKV nsP2 (**A**) and E2 (**B**) RNA levels were measured in cell lysates. (**C**) NHDFs were infected with CHIKV<sub>181-25</sub>  
65 (MOI = 25 PFU/cell), and cells were treated with dasatinib at 2 hpi or untreated. At 8 hpi, cells were fixed and  
66 analyzed for levels of dsRNA (green) and counterstained with DAPI (blue) and Phalloidin (red) (NI = uninfected, ND =  
67 no drug).  
68



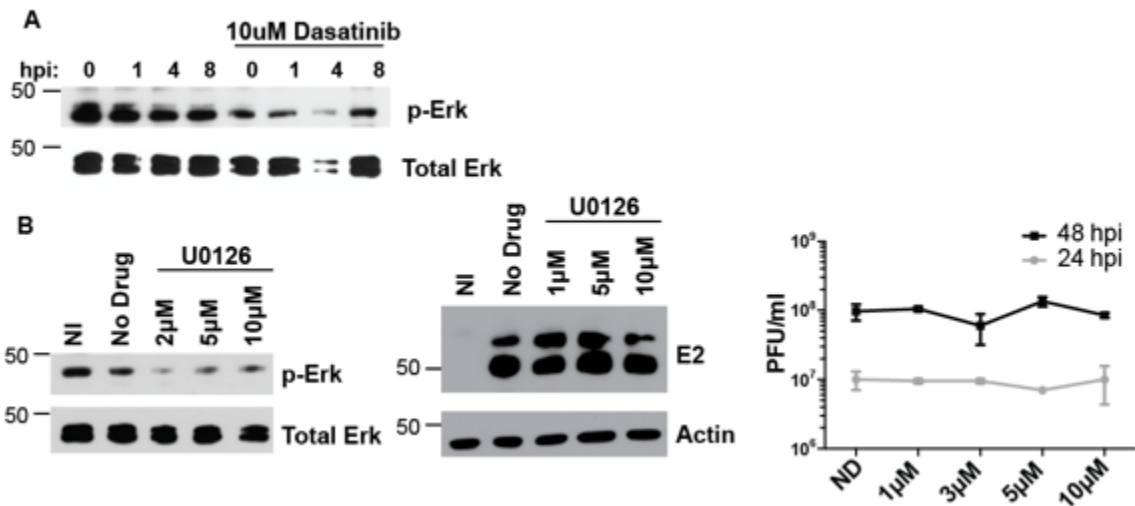

69  
70 **Supplemental Figure 7. Erk inhibitor U0126 does not block CHIKV infection.** (A) NHDFs were treated with  
71 dasatinib 30 minutes prior to infection and infected with CHIKV (MOI = 1 PFU/cell). Phosphorylation of Erk and total  
72 Erk protein levels were detected by western blotting. (B) NHDFs were treated with U0126 at 2 hpi, and cell lysates  
73 were analyzed at 24 hpi for p-Erk and total Erk (left panel), CHIKV E2 and Actin (center panel) by western blotting.  
74 (Right panel) NHDFs were infected with CHIKV (MOI = 1 PFU/cell), treated with U0126 at 2 hpi, and supernatants  
75 were collected at 24 hpi and 48 hpi and titered on Vero cells.
